**TITLE: EFFECT OF FRESH GAS FLOW ON INSPIRED AND EXPIRED CONCENTRATIONS OF ANESTHETICS IN MAN.**

**AUTHORS:** DERIAZ H., BARAS E., LIENHART A.  
**AFFILIATION:** Anes. Dept. Saint-Antoine Hospital  
PARIS - FRANCE

**INTRODUCTION :** In rebreathing systems inspired ( $F_i$ ) and expired ( $F_E$ ) anesthetic concentrations vary with many factors: concentration delivered by the vaporizer ( $F_V$ ), fresh gas flow ( $\dot{V}_{FG}$ ), circle system volume, minute ventilation ( $\dot{V}_E$ ), anesthetic uptake. Each factor has been studied with models. The aim of this study was to provide such data from anesthetized man for clinical use.

**METHODS :** 90 ASA I-II adult patients gave informed consent and were randomly distributed into 18 groups of 5 patients, according to the volatile agent (halothane, enflurane or isoflurane), and to  $\dot{V}_{FG}$ : in subgroups a:  $\dot{V}_{FG} = \dot{V}_{O_2} \times 2$ ; b:  $\dot{V}_{O_2} \times 4$ ; c:  $\dot{V}_E/4$ ; d:  $\dot{V}_E/2$ ; e:  $\dot{V}_E$ ; f:  $\dot{V}_E \times 2$ . Measurements were recorded from: Icor® Caloximeter for oxygen uptake ( $\dot{V}_{O_2}$ ), Dräger® flowmeters for  $\dot{V}_E$  and for  $\dot{V}_{FG}$ , Datex® Capnomac for  $CO_2$  and vapor concentrations. Flunitrazepam, fentanyl and pancuronium were used for induction of anesthesia and given on demand for maintenance. Ventilation was controlled with a Dräger® SA1 circle system without nitrous oxide.  $\dot{V}_E$  was adjusted to have a  $P_{ET}CO_2$  in a 32-34 mmHg range.  $\dot{V}_{O_2}$  was measured 10 min after induction.  $F_i$  and  $F_E$  were recorded every 5 min up to 30 min. Vaporizers (Dräger® Vapor 19) were calibrated before each procedure, with a direct measure of  $F_V$ . For each

patient,  $F_V$  was held at a preset level expected to induce a .5 MAC  $F_E$  within 30 min. Results are expressed as mean  $\pm$  sem.

**RESULTS:**  $F_E/F_i$  ratios at 30 min are shown in tab.1: they do not depend on  $\dot{V}_{FG}$ . Time-course of  $F_i/F_V$  and  $F_E/F_V$  for isoflurane is shown in fig.1: the change in  $F_i$  is slight after 15 min whatever the  $\dot{V}_{FG}$ . It is the same for halothane and enflurane.  $F_i/F_V$  ratio is linearly related to  $\dot{V}_{FG}/\dot{V}_E$  on a semilogarithmic scale (fig.2):  $r=.95$ ,  $n=90$ . To obtain a given  $F_E$ , a preset  $F_V$  can be easily computed from  $\dot{V}_{FG}$  and  $\dot{V}_E$ .

**Tab. 1:  $F_E/F_i$  ratio at 30 min**

| $\dot{V}_{FG}$ | $\dot{V}_{O_2} \times 2$ | $\dot{V}_{O_2} \times 4$ | $\dot{V}_E/4$ | $\dot{V}_E/2$ | $\dot{V}_E$   | $\dot{V}_E \times 2$ |
|----------------|--------------------------|--------------------------|---------------|---------------|---------------|----------------------|
| Hal.           | .68 $\pm$ .01            | .70 $\pm$ .04            | .64 $\pm$ .02 | .70 $\pm$ .04 | .66 $\pm$ .02 | .61 $\pm$ .03        |
| Enf.           | .64 $\pm$ .04            | .64 $\pm$ .03            | .65 $\pm$ .01 | .65 $\pm$ .02 | .59 $\pm$ .05 | .61 $\pm$ .03        |
| Iso.           | .66 $\pm$ .03            | .69 $\pm$ .03            | .68 $\pm$ .03 | .69 $\pm$ .01 | .70 $\pm$ .01 | .66 $\pm$ .01        |

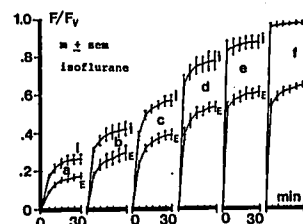

**Fig.1: Time-course of  $F_i/F_V$  and  $F_E/F_V$  for isoflurane subgroups**

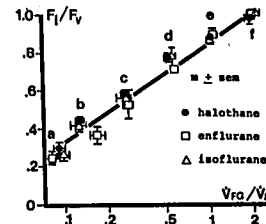

**Fig.2: Linear relationship between  $F_i/F_V$  and  $\dot{V}_{FG}/\dot{V}_E$  ratios at 30 min on a semilogarithmic scale**

**TITLE: Pulsatile flow during cardiopulmonary bypass for coronary surgery fail to influence plasma atrial natriuretic factor concentration.**

**AUTHORS** I Deswarte-Pipien, M.D., O.Ponzio, M.D., C.Barthelemy, Ph.D., P.Lobstein, M.D., J.N.Fabiani, M.D., A.Carayon, Ph.D., M.Th.Cousin, M.D.

**AFFILIATION:** DARC - Hôpital BROUSSAIS, 96, rue didot - 75014 PARIS - FRANCE

In 1975 Taylors studies demonstrate lower vascular resistance during and after cardiopulmonary bypass (CPB) when the CPB flow was pulsatile owing to a less stimulated Renine Angiotensine System (1). In a posterior study Frater et Coll (2) did not observe any influence of the CPB pulsatile flow (PF) on hormonal secretion or haemodynamics parameters. Plasma concentration of ANF (pANF) is known to be elevated during non-pulsatile (NPF) CPB (3). The aim of our study is to specify if pulsatile flow do influence the ANF secretion.

We studied 12 patients (with informed oral consent and approval by our local hospital ethical committee) NYHA I or II and free of renal disease, admitted for coronary surgery. Anaesthesia was performed by high doses of fentanyl, flunitrazepam and pancuronium. For 6 patients, CPB flow was pulsatile (centrifugal Delphin pump system, 3M), with a difference between systolic and diastolic arterial pressure ( $\Delta AP$ ) at  $12 \pm 5$  mmHg, and non pulsatile for the others. Blood samples were drawn at: T0, after induction of anaesthesia and before surgery; T1, at the pericardotomy; T2, during steady CPB; T3, just after cardiac recovery before stopping CPB; T4, 20 mn after the end of CPB. At these times were measured: ANF, vasopressin (AVP), plasma renin activity (PRA), epinephrine

(E) and norepinephrine (NE). Haemodynamics parameters were measured with a Swan Ganz catheter.

Results (mean (m) and standard error (se)) are shown in the table 1. In both groups AVP reached a very high levels at T2, plasma concentration of ANF and of the others hormones increased at T3. In contrast vascular resistances were stable during all the procedure. Cardiac filling pressure before and after CPB were not statistically different. We did not observe any correlation between none of these parameters and the pulsatility.

The concomitant elevation of vasoconstrictor and vasodilator hormones and the high doses of fentanyl and flunitrazepam may account for this vascular resistance stability. An insufficient  $\Delta AP$ , or a no suitable systole diastole duration ratio have to be considered in order to explain the fail of pulsatile CPB influence on hormonal and haemodynamic parameters.

**REFERENCES :**

- 1 - J Thorac Cardiovasc Surg 1978 (75), 575-579
- 2 - Circulation 1980 (62), 1-19, 1-25
- 3 - J Thorac Cardiovasc Surg 1983 (96), 267-270

| m(se) | ANF      | AVP       | PRA      | E        | NE        | SVR            |
|-------|----------|-----------|----------|----------|-----------|----------------|
| T2    | pg/ml    | pg/ml     | ng/ml/h  | pg/ml    | pg/ml     | dyn/cm5/sec/m2 |
| PF    | 59(5)    | 35(15)    | 1.7(.8)  | 654(404) | 880(290)  | 2259(376)      |
| NPF   | 74(20)   | 25(9.3)   | 1.5(.5)  | 177(92)  | 329(50)   | 2236(116)      |
| T3    |          |           |          |          |           |                |
| PF    | 202(61)  | 14.6(2.5) | 1.8(.4)  | 469(232) | 1250(357) |                |
| NPF   | 192(48)  | 18(4.7)   | 2.3(1.6) | 138(38)  | 621(134)  |                |
| T4    |          |           |          |          |           |                |
| PF    | 253(106) | 13(5.2)   | 2.2(.5)  | 168(85)  | 741(425)  | 2103(228)      |
| NPF   | 188(43)  | 11(2.5)   | 1.2(.4)  | 63(23)   | 432(141)  | 2060(140)      |
